# Supplementary material for: A thermoresponsive poly(N-vinylcaprolactam-co-sulfobetaine methacrylate) zwitterionic hydrogel exhibiting switchable anti-biofouling and cytocompatibility
Source: Royal Society of Chemistry journal article supplement (doi:10.1039/c5py00123d), 2015-01-01
Supplement: c5py00123d1.pdf [file c5py00123d1.pdf]

**Table S1.** Preparation parameters of P(VCL-co-SBMA) hydrogels

| Hydrogel Sample             | Monomer Molar Ratio |         | Cross-linker | Solvent   |                       |
|-----------------------------|---------------------|---------|--------------|-----------|-----------------------|
|                             | VCL(%)              | SBMA(%) | MBAA(%)      | DMSO (ml) | H <sub>2</sub> O (ml) |
| PVCL                        | 100                 | 0       | 8            | 5         | 1                     |
| P(VCL-co-SBMA) <sub>1</sub> | 88.9                | 11.1    | 8            | 4         | 2                     |
| P(VCL-co-SBMA) <sub>2</sub> | 66.9                | 33.1    | 8            | 2.5       | 3.5                   |
| P(VCL-co-SBMA) <sub>3</sub> | 46.2                | 53.8    | 8            | 1.5       | 4.5                   |
| PSBMA                       | 0                   | 100     | 8            | 0         | 6                     |

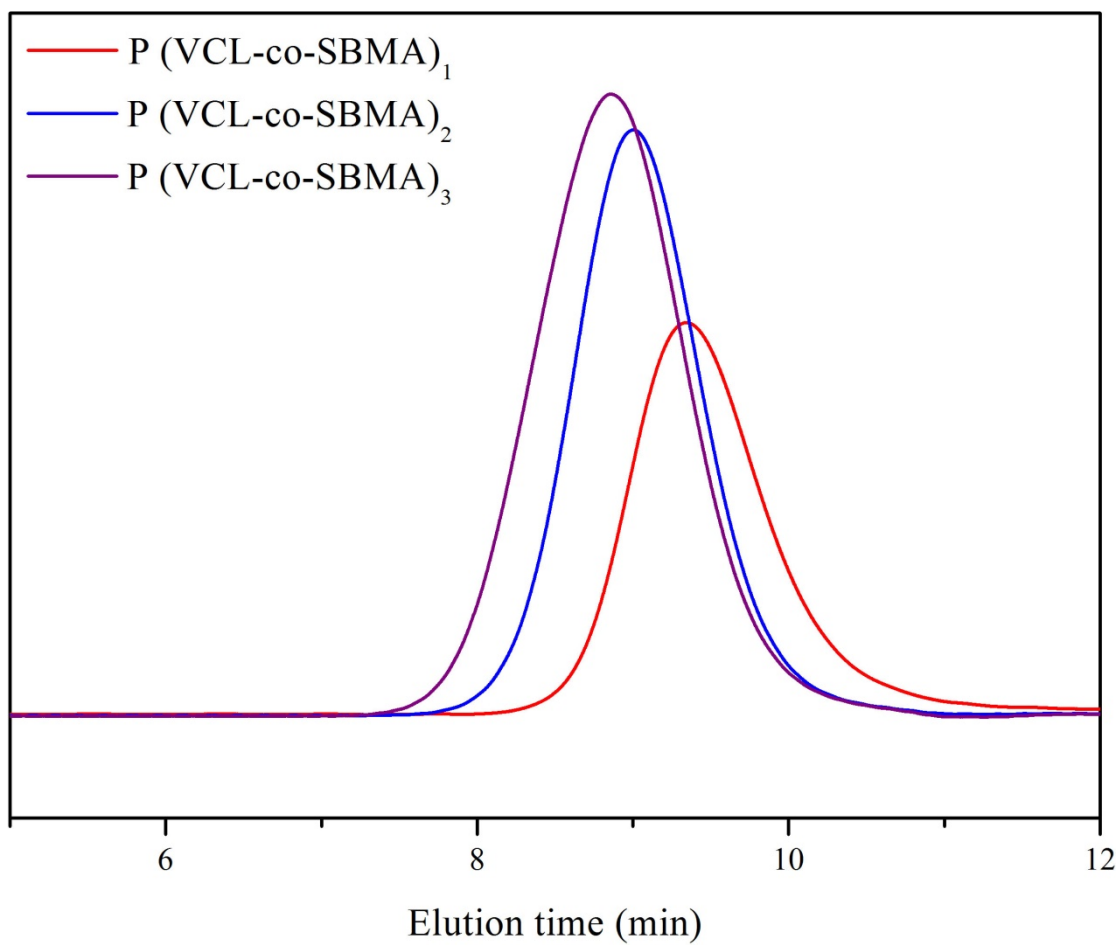

**Figure S1.** GPC traces of P(VCL-co-SBMA) copolymers.

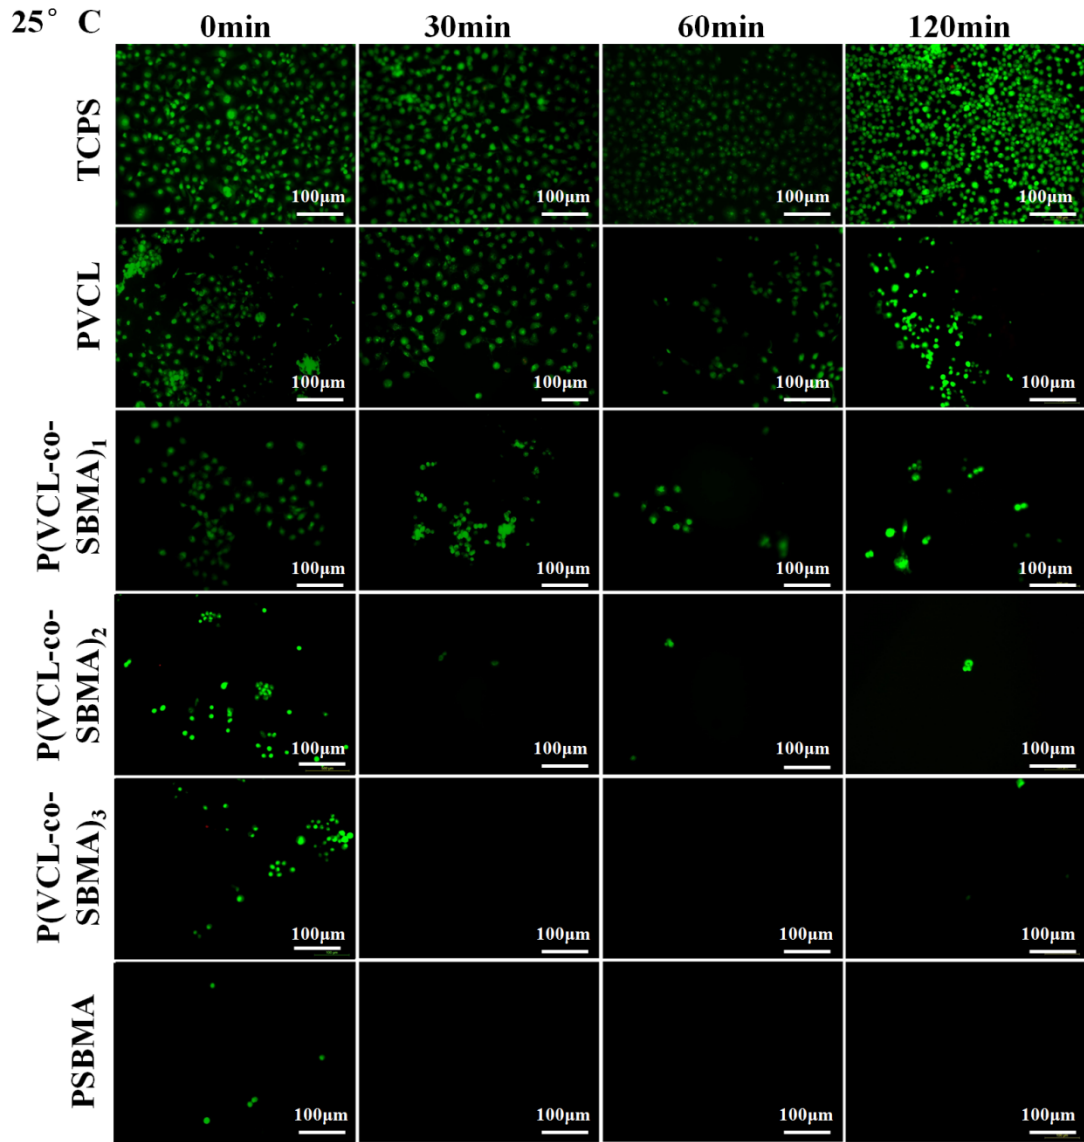

**Figure S2.** Fluorescence microscopic images of HUVECs cell detachment from the surfaces of TCPS, PVCL hydrogel, P(VCL-co-SBMA) hydrogels, and PSBMA hydrogel at 25°C for 0, 30, 60, and 120 min.
